# Supplementary material for: Ligand response of guanidine-IV riboswitch at single-molecule level
Source: eLife journal article supplement (doi:10.7554/elife.94706), 2024-03-19

Figure 2—figure supplement 10C

Gua<sup>+</sup>: 0 0.005 0.01 0.05 0.1 0.5 1.0 5.0 10.0 mM

riboG-wt

6 mM Mg<sup>2+</sup>

FL →

T →

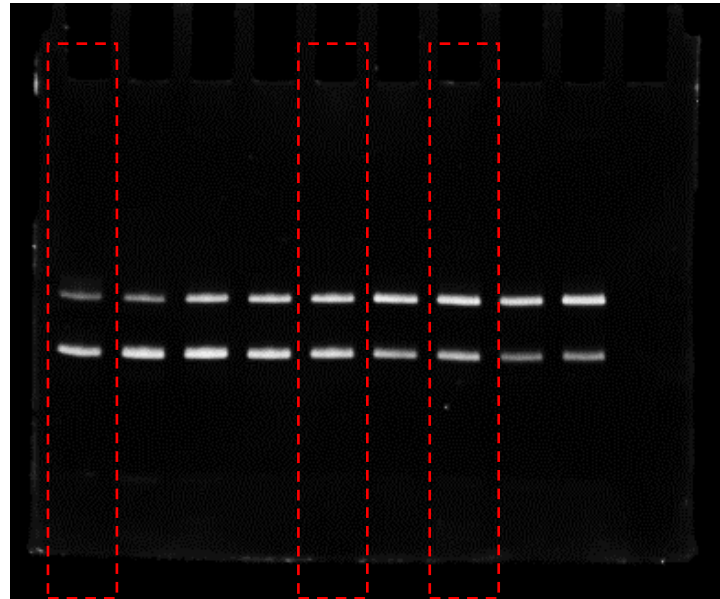

Gua<sup>+</sup>: 0 0.1 1.0 mM

riboG-G77C

6 mM Mg<sup>2+</sup>

FL →

T →

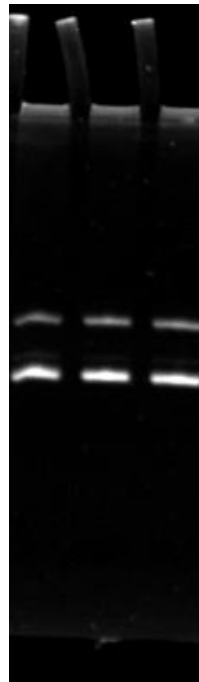

Supplement: fig2-figsupp10-data2 [file elife-94706-fig2-figsupp10-data2-v1.zip]
