# Supplementary material for: Ligand response of guanidine-IV riboswitch at single-molecule level
Source: eLife journal article supplement (doi:10.7554/elife.94706), 2024-03-19
Supplement: fig7-data2 [file elife-94706-fig7-data2-v1.zip]

Figure 7C

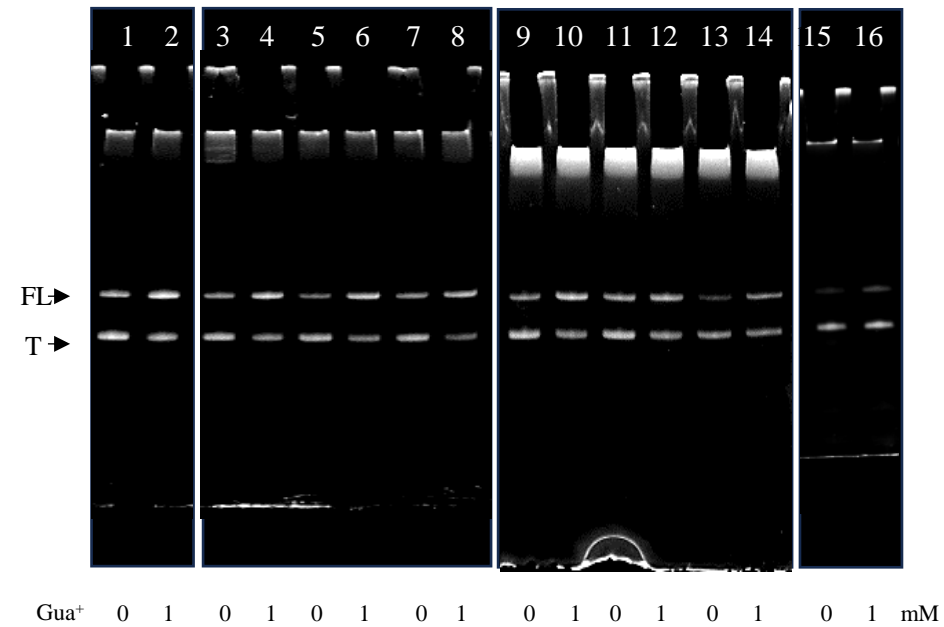

- 1–2: The crude products collected at the last step of 9 step PLOR in the absence and presence of 1.0 mM Gua<sup>+</sup>.
- 3–4: The crude products collected at the last step of 11 step PLOR in the absence and presence of 1.0 mM Gua<sup>+</sup>.
- 5–6: The crude products collected at the last step of 12 step PLOR in the absence and presence of 1.0 mM Gua<sup>+</sup>.
- 7–8: The crude products collected at the last step of 13 step PLOR in the absence and presence of 1.0 mM Gua<sup>+</sup>.
- 9–10: The crude products collected at the last step of 14 step PLOR in the absence and presence of 1.0 mM Gua<sup>+</sup>.
- 11–12: The crude products collected at the last step of 15 step PLOR in the absence and presence of 1.0 mM Gua<sup>+</sup>.
- 13–14: The crude products collected at the last step of 16 step PLOR in the absence and presence of 1.0 mM Gua<sup>+</sup>.
- 15–16: The crude products collected at the step 16 and step 17 of 17 step PLOR in the absence and presence of 1.0 mM Gua<sup>+</sup>.
