# Supplementary material for: Ligand response of guanidine-IV riboswitch at single-molecule level
Source: eLife. 2024 Dec 2;13:RP94706. doi: 10.7554/eLife.94706 (PMC11611296; doi:10.7554/eLife.94706)
Supplement: Figure 1—source data 1. [file elife-94706-fig1-data1.xlsx]

## Sheet: Figure 1D
Figure 1D
Gua+（mM）	Averaged(%)	SD（%）	N
0.0005	20.317	0.901	3
0.001	21.145	0.812	3
0.005	21.256	0.84	3
0.01	33.461	2.2	3
0.05	41.608	0.166	3
0.1	46.493	0.117	3
0.5	60.419	2.152	3
1	60.051	1.903	3
5	70.283	4.52	3
10	70.544	3.81	3
20	70.162	3.078	3
