# Supplementary material for: Ligand response of guanidine-IV riboswitch at single-molecule level
Source: eLife. 2024 Dec 2;13:RP94706. doi: 10.7554/eLife.94706 (PMC11611296; doi:10.7554/eLife.94706)
Supplement: Figure 2—figure supplement 6—source data 1. [file elife-94706-fig2-figsupp6-data1.xlsx]

## Sheet: Figure 2—figure supplement 6H
Figure 2—figure supplement 6H
0.5 mM Mg2+
Gua+(mM)	Averaged	SD	N
0.01	0.12	0.01	3
0.05	0.25	0.03	3
0.1	0.28	0.02	3
0.5	0.68	0.04	3
1	0.87	0.02	3
10	1	0.07	3
Data Processing
1) Maximal responses normalized to 0.5 mM Mg2+ and 10 mM Gua+ of the riboG-apt
