# Supplementary material for: Ligand response of guanidine-IV riboswitch at single-molecule level
Source: eLife. 2024 Dec 2;13:RP94706. doi: 10.7554/eLife.94706 (PMC11611296; doi:10.7554/eLife.94706)
Supplement: Figure 2—source data 1. [file elife-94706-fig2-data1.xlsx]

## Sheet: Figure 2E
Figure 2E
Mg2+(mM)	Averaged（%）	SD（%）	N				Gua+（mM）	Averaged（%）	SD（%）	N
0	0	0	3				0.5	2.3	1.4	3
0.5	3.2	1.8	3				1	3.9	1	3
1	5	0.9	3				5	4.2	1.3	3
2	25.9	3.2	3				10	11.2	0.8	3
6	45.5	4.1	3				20	24.5	2.4	3
10	71.1	2.7	3				50	43.2	3.1	3
20	90.4	2.3	3				100	77.3	4.1	3
50	79.1	3.2	3

## Sheet: Figure 2F
Figure 2F
Mg2+(mM)	Gua+（mM）	Averaged（%）	SD（%）	N
0	0	0	0	3
0.5	0	3.2	1.8	3
1	0	5	0.9	3
2	0	25.9	3.2	3
0	0.5	2.3	1.4	3
0.5	0.5	46.9	2.6	3
1	0.5	62.8	2.9	3
2	0.5	73.3	2.3	3
0	1	3.9	1	3
0.5	1	59.5	1.2	3
1	1	78.9	2.3	3
2	1	85.4	3.1	3
