# Supplementary material for: Ligand response of guanidine-IV riboswitch at single-molecule level
Source: eLife. 2024 Dec 2;13:RP94706. doi: 10.7554/eLife.94706 (PMC11611296; doi:10.7554/eLife.94706)
Supplement: Figure 3—source data 1. [file elife-94706-fig3-data1.xlsx]

## Sheet: Figure 3C
Figure 3C
Mg2+(mM)	Averaged（%）	SD（%）	N				Gua+（mM）	Averaged（%）	SD（%）	N
0	17.4	2.9	3				1	21.4	3.3	3
0.5	18.2	3	3				5	20.2	2.1	3
1	15.6	2.8	3				10	21.7	4	3
2	20.6	2.9	3				50	22.7	3.5	3
6	18.3	3.5	3				100	21.5	4.6	3
10	15.1	1.8	3
20	11.6	1.5	3
50	16.3	2.1	3

## Sheet: Figure 3D
Figure 3D
Mg2+(mM)	Gua+（mM）	Averaged（%）	SD（%）	N
0	0	17.4	2.9	3
0.5	0	18.2	3	3
2	0	20.6	2.9	3
6	0	18.3	3.5	3
10	0	15.1	1.8	3
0	1	21.4	3.3	3
0.5	1	21.1	2.8	3
2	1	24.6	3	3
6	1	24.5	2.6	3
10	1	29.2	2.7	3

## Sheet: Figure 3E
Figure 3E
Mg2+(mM)	Gua+（mM）	Averaged（%）	SD（%）	N
0	0	17.4	2.9	3
0	1	21.4	3.3	3
0	5	20.2	2.1	3
0	10	21.7	4	3
0	50	22.7	3.5	3
0	100	21.5	4.6	3
10	0	15.1	1.8	3
10	1	29.2	2.7	3
10	5	42	3.6	3
10	10	45.4	2.3	3
10	50	50.9	2.9	3
10	100	49	2.3	3
