# Supplementary material for: Ligand response of guanidine-IV riboswitch at single-molecule level
Source: eLife. 2024 Dec 2;13:RP94706. doi: 10.7554/eLife.94706 (PMC11611296; doi:10.7554/eLife.94706)
Supplement: Figure 4—source data 1. [file elife-94706-fig4-data1.xlsx]

## Sheet: Figure 4C
Figure 4C
Mg2+(mM)	Gua+（mM）	Averaged（%）	SD（%）	N
0	0	9.9	1.6	3
0	1	10.5	2.7	3
0	5	14.2	2	3
0	10	11.7	1.8	3
0	50	7.5	1.6	3
0	100	11.7	1.4	3
10	0	13.1	1.1	3
10	1	19	1	3
10	5	36.9	2.2	3
10	10	38.7	4.6	3
10	50	44.2	3.6	3
10	100	46.4	4.7	3

## Sheet: Figure 4D
Figure 4D
	riboG-apt		riboG-term		riboG-full length
Mg2+(mM)	Averaged	SD	Averaged	SD	Averaged	SD	N
0	0	0	0.22	0.04	0.13	0.02	3
0.5	0.04	0.02	0.23	0.04	0.13	0.02	3
1	0.06	0.01	0.2	0.04	0.17	0.03	3
2	0.33	0.04	0.26	0.04	0.14	0.03	3
6	0.58	0.05	0.23	0.02	0.15	0.02	3
10	0.9	0.03	0.19	0.02	0.17	0.01	3
50	1	0.04	0.21	0.03	0.25	0.03	3
Data Processing
1) Maximal responses normalized to 50.0mM Mg2+ of the riboG-apt

## Sheet: Figure 4E
Figure 4E
		riboG-apt		riboG-term		riboG-full length
Mg2+(mM)	Gua+（mM）	Averaged	SD	Averaged	SD	Averaged	SD	N
10	0	0.83	0.03	0.17	0.02	0.15	0.01	3
10	1	0.88	0.03	0.34	0.03	0.22	0.01	3
10	5	0.91	0.03	0.49	0.05	0.43	0.02	3
10	10	0.95	0.03	0.52	0.02	0.45	0.06	3
10	50	0.94	0.05	0.59	0.03	0.51	0.05	3
10	100	1	0.03	0.57	0.02	0.53	0.06	3
Data Processing
1) Maximal responses normalized to 10.0mM Mg2+ and 100 mM Gua+ of the riboG-apt
