# Supplementary material for: Ligand response of guanidine-IV riboswitch at single-molecule level
Source: eLife. 2024 Dec 2;13:RP94706. doi: 10.7554/eLife.94706 (PMC11611296; doi:10.7554/eLife.94706)
Supplement: Figure 6—source data 1. [file elife-94706-fig6-data1.xlsx]

## Sheet: Figure 6J
Figure 6J
	0.5 mM Mg2+ + 1.0 mM Gua+		2.0 mM Mg2+ + 1.0 mM Gua+		0.5 mM Mg2+ + 10 mM Gua+
	Averaged	SD	Averaged	SD	Averaged	SD	N
EC-87	0.29	0.04	0.44	0.07	0.49	0.08	3
EC-88	0.41	0.08	0.6	0.07	1	0.07	3
EC-89	0.1	0.03	0.15	0.02	0.23	0.04	3
EC-91	0.14	0.03	0.21	0.02	0.21	0.04	3
EC-94	0.06	0.02	0.3	0.09	0.26	0.05	3
EC-96	0.23	0.03	0.09	0.03	0.21	0.04	3
EC-105	0.02	0.01	0.16	0.03	0.15	0.02	3
Data Processing
1) Maximal responses normalized to 0.5 mM Mg2+ and 10 mM Gua+ of the EC-88
