# Supplementary material for: Ligand response of guanidine-IV riboswitch at single-molecule level
Source: eLife. 2024 Dec 2;13:RP94706. doi: 10.7554/eLife.94706 (PMC11611296; doi:10.7554/eLife.94706)
Supplement: Figure 7—source data 3. [file elife-94706-fig7-data3.xlsx]

## Sheet: Figure 7D
Figure 7D
	0 mM Gua+		1.0 mM Gua+
Halting sites	Averaged（%）	SD（%）	Averaged（%）	SD（%）	N
69	35.2	2.7	60.1	5.1	3
77	37.3	3.2	59.6	3.3	3
78	35.1	3.2	60.4	1.9	3
83	39.6	3.1	61	6.1	3
88	34.4	3.1	57.9	5.3	3
91	41.1	2.2	51.6	3.2	3
94	31.4	4.4	44.1	3.2	3
105	10.6	4.2	16.1	3.5	3
