# Supplementary figures and images for: Ligand response of guanidine-IV riboswitch at single-molecule level
Source: eLife journal article supplement (doi:10.7554/elife.94706), 2024-03-19

Figure 6—figure supplement 1C

530  
nm

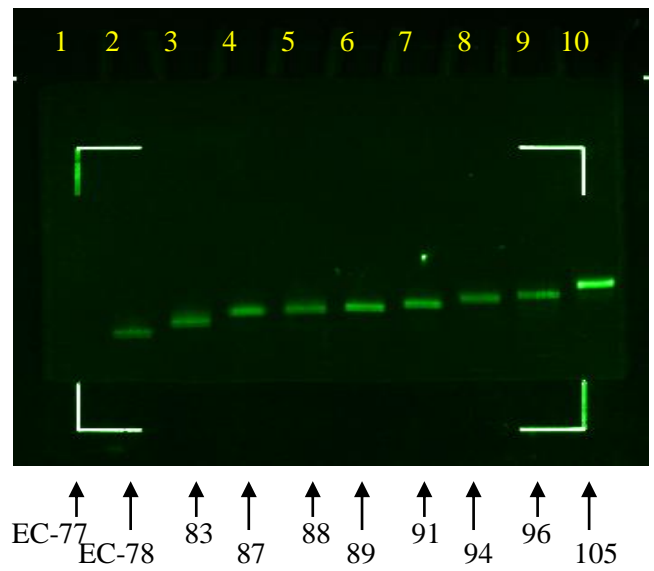

620  
nm

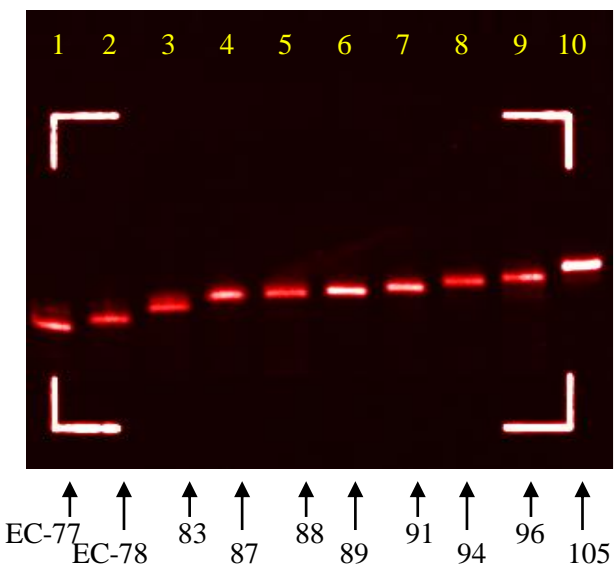

merge

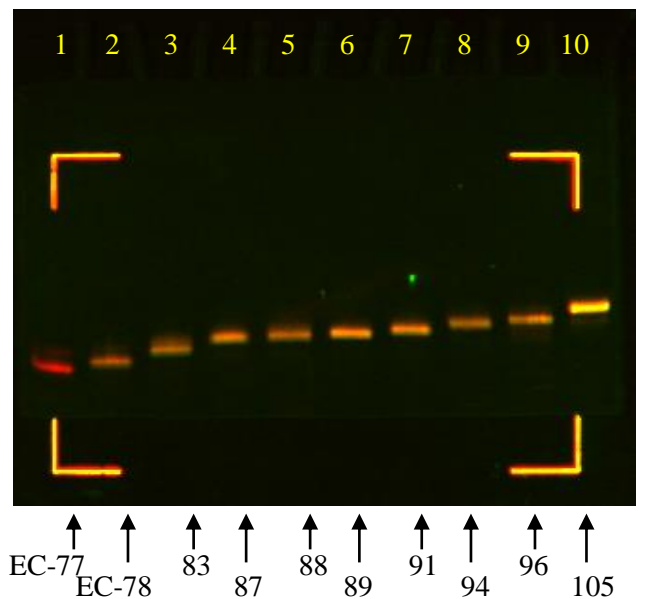

Supplement: fig6-figsupp1-data2 [file elife-94706-fig6-figsupp1-data2-v1.zip]
